# Supplementary material for: Tailoring atomically dispersed cobalt–nitrogen active sites in wrinkled carbon nanosheets via “fence” isolation for highly sensitive detection of hydrogen peroxide
Source: Royal Society of Chemistry journal article supplement (doi:10.1039/d1ta09645a), 2021-12-24
Supplement: d1ta09645a1.pdf [file d1ta09645a1.pdf]

## Supporting Information

# Tailoring Atomically Dispersed Cobalt-Nitrogen Active Sites in Wrinkled Carbon Nanosheets via “Fence” Isolation for Highly Sensitive Detection of Hydrogen Peroxide

Yue Hu<sup>a</sup>, Chen Bai<sup>b</sup>, Meng Li<sup>a</sup>, Mirabbos Hojamberdiev<sup>c</sup>, and Dongsheng Geng<sup>a,d,\*</sup>, Xiaoguang Li<sup>e,\*</sup>

*<sup>a</sup>Beijing Advanced Innovation Center for Materials Genome Engineering, Beijing Key Laboratory for Magneto-Photoelectrical Composite and Interface Science, School of Mathematics and Physics, University of Science and Technology Beijing, Beijing 100083, China*

*<sup>b</sup>Tsinghua Shenzhen International Graduate School, Tsinghua University, Shenzhen 518055, China*

*<sup>c</sup>Institut für Chemie, Technische Universität Berlin, Straße des 17. Juni 135, 10623 Berlin, Germany*

*<sup>d</sup>School of Materials Science and Engineering, University of Science and Technology Beijing, Beijing 100083, China*

*<sup>e</sup>Institute of Intelligent Unmanned Systems, School of Automation, Qingdao University, Qingdao, 266071, China*

\*Corresponding author: [dgeng@ustb.edu.cn](mailto:dgeng@ustb.edu.cn)

[lixiaoguang@qdu.edu.cn](mailto:lixiaoguang@qdu.edu.cn)

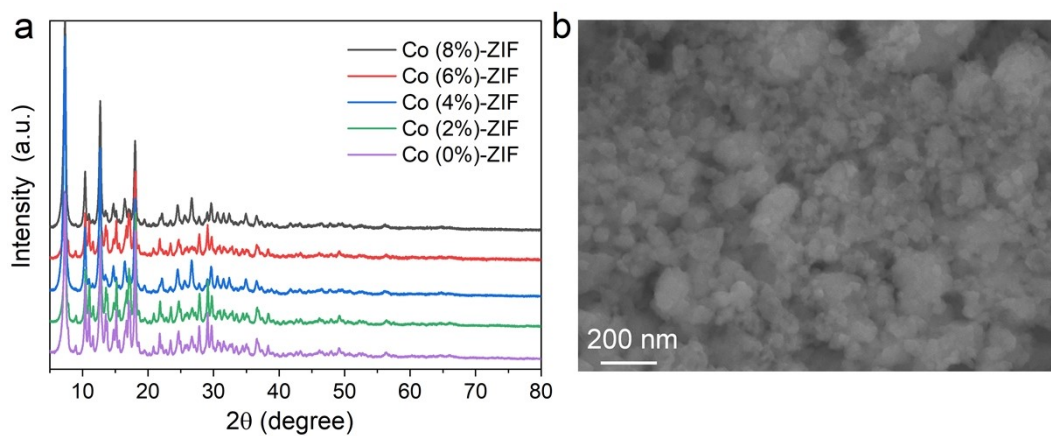

**Figure S1.** (a) XRD patterns of Zn/Co bimetallic ZIFs with different Zn/Co molar ratios (0, 2, 4, 6, and 8%) and (b) SEM image of Zn/Co ZIF (4% Co).

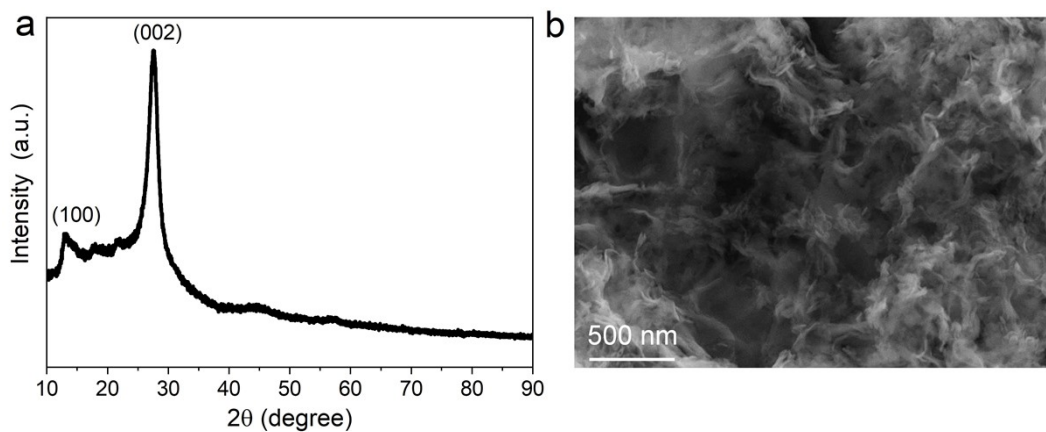

**Figure S2.** (a) XRD pattern and (b) SEM image of pristine  $g\text{-C}_3\text{N}_4$ .

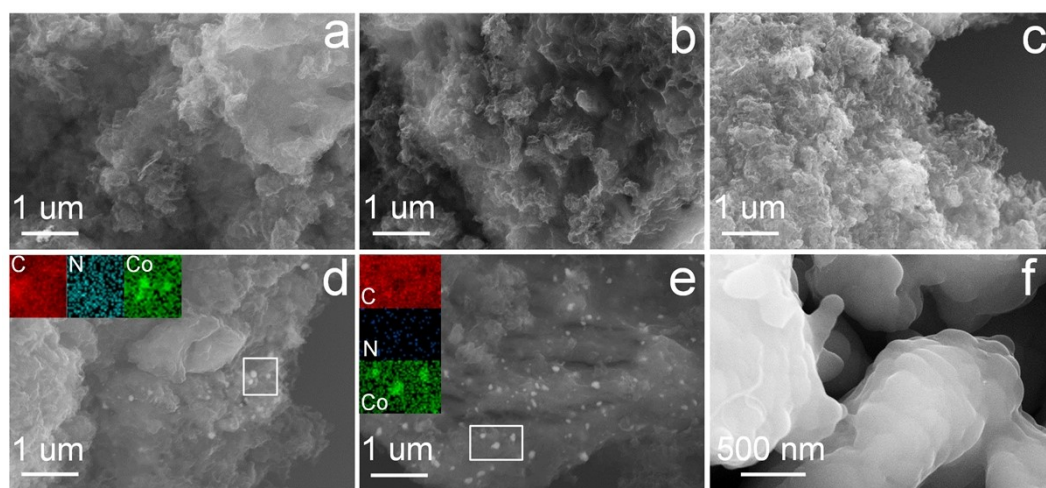

**Figure S3.** (a-e) SEM images of Co-N/CNS electrocatalysts obtained using  $g\text{-C}_3\text{N}_4$  and Zn/Co ZIFs with different Zn/Co molar ratios and (f) SEM image of Co-N/C electrocatalyst obtained from Zn/Co ZIF (4% Co).

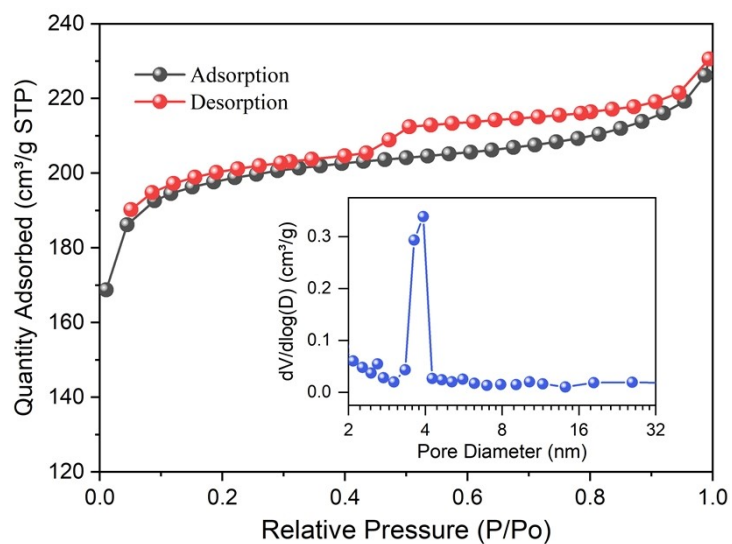

**Figure S4.** N<sub>2</sub> adsorption-desorption isotherm and pore-size distribution curve (inset) of Co (4%)-N/C.

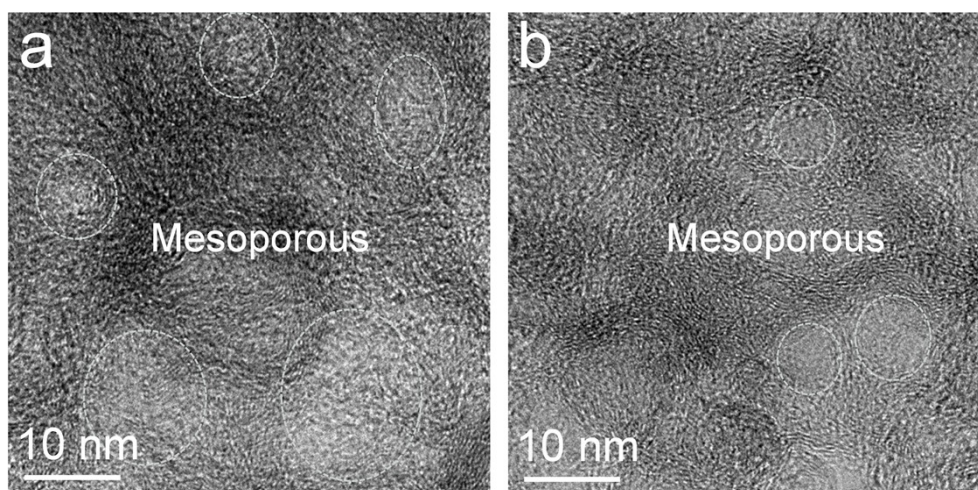

**Figure S5.** HRTEM images of Co (4%)-N/CNS. The white circles indicate mesopores.

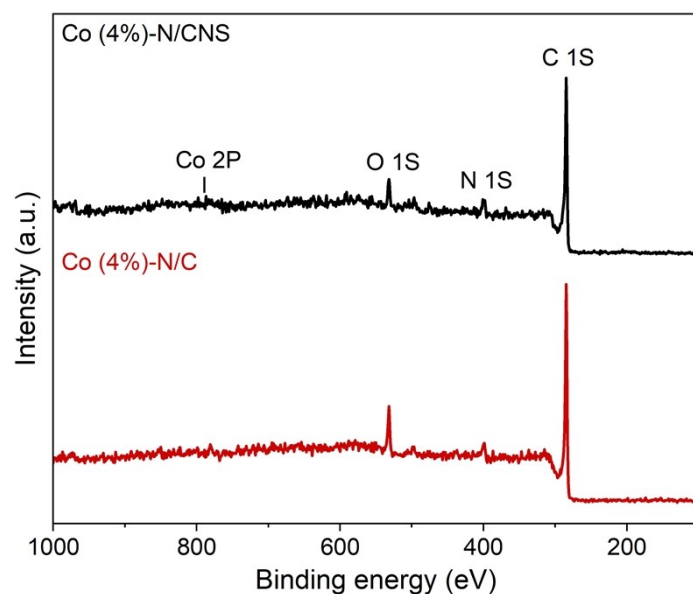

**Figure S6.** XPS survey spectra of Co (4%)-N/CNS and Co (4%)-N/C.

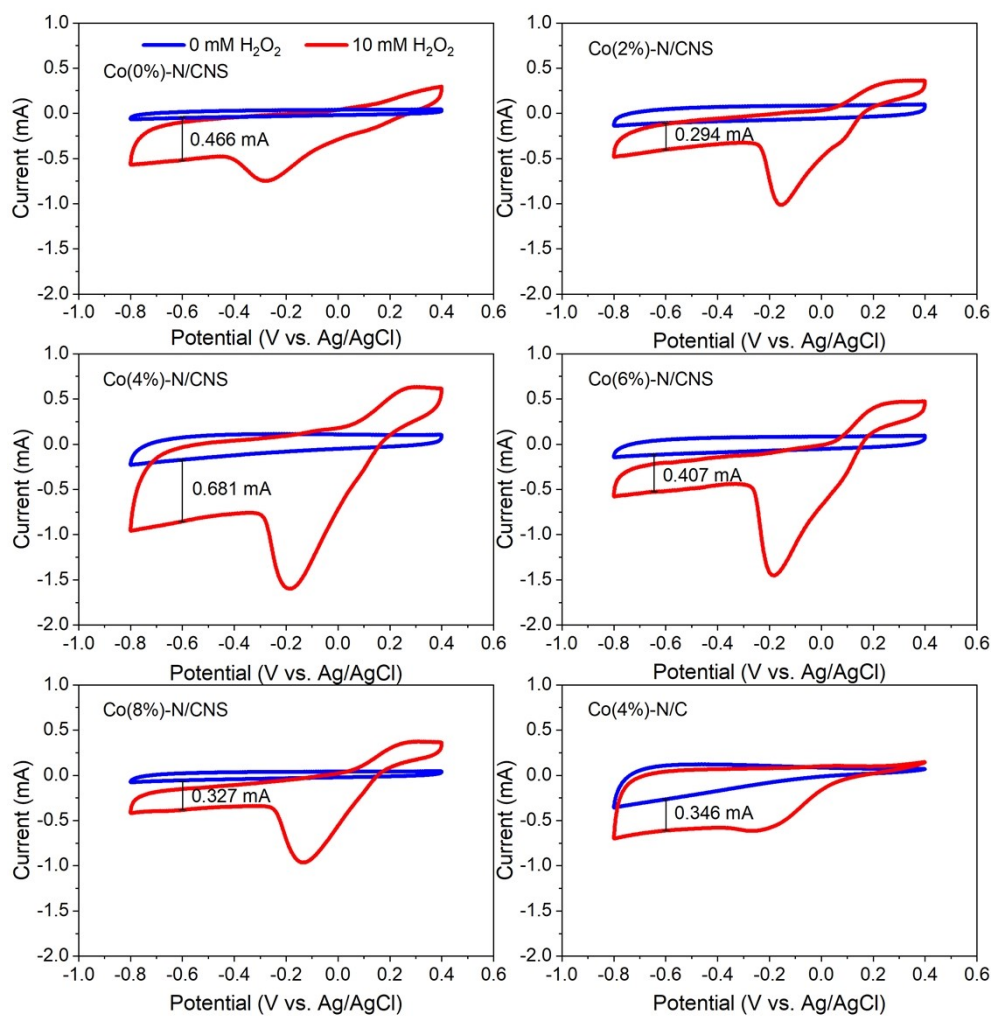

**Figure S7.** Catalytic reduction performance of Co (0%)-N/CNS, Co (2%)-N/CNS, Co (4%)-N/CNS, Co (6%)-N/CNS, Co (8%)-N/CNS, and Co (4%)-N/C toward 10 mM H<sub>2</sub>O<sub>2</sub>.

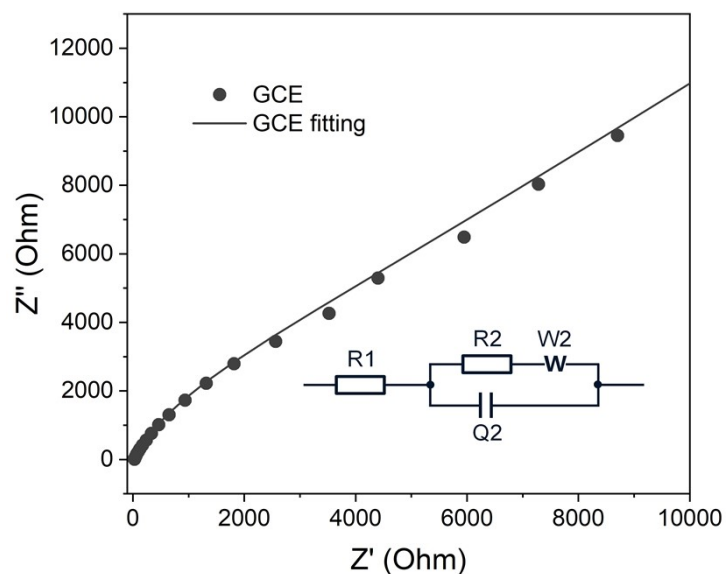

**Figure S8.** Nyquist plots measured at an applied potential of -0.7 V and corresponding equivalent circuit of bare GCE.

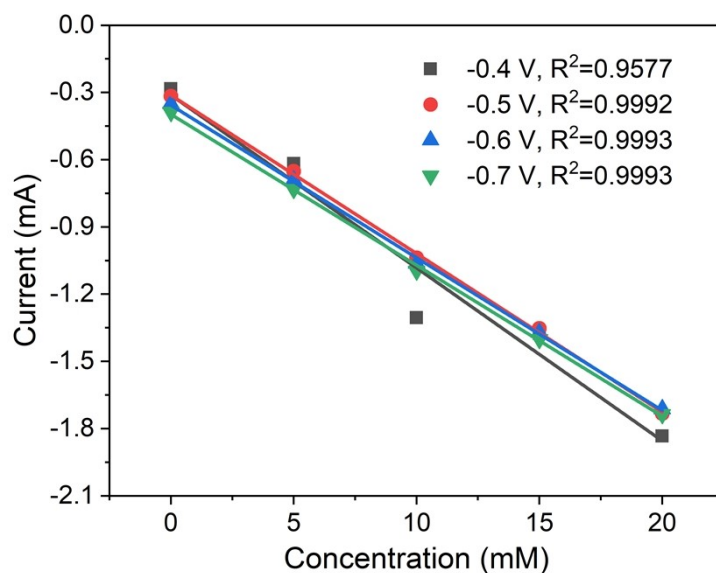

**Figure S9.** Reduction current responses of Co (4%)-N/CNS to different concentrations of  $H_2O_2$  (0, 5, 10, and 20 mM) at different voltages (-0.4, -0.5, -0.6, and -0.7 V vs. Ag/AgCl).

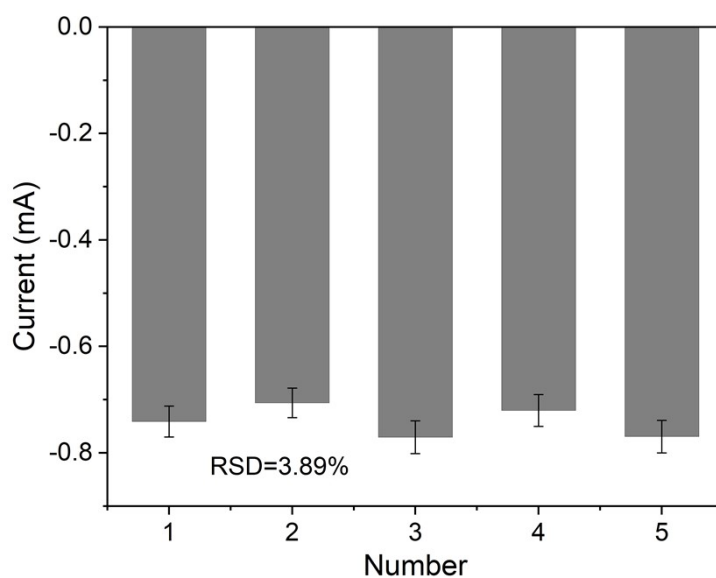

**Figure S10.** Current responses of Co (4%)-N/CNS-based sensors to 5 mM H<sub>2</sub>O<sub>2</sub> in five consecutive cycles.

**Table S1.** Porous properties of Co (4%)-N/C and Co (4%)-N/CNS.

| Materials     | Porosity parameter                                  |                                           |                                                      |                          | Average pore diameter (nm) |
|---------------|-----------------------------------------------------|-------------------------------------------|------------------------------------------------------|--------------------------|----------------------------|
|               | $S_{\text{BET}}$ (m <sup>2</sup> ·g <sup>-1</sup> ) | $V_t$ (cm <sup>3</sup> ·g <sup>-1</sup> ) | $V_{\text{mic}}$ (cm <sup>3</sup> ·g <sup>-1</sup> ) | $V_{\text{mic}}/V_t$ (%) |                            |
| Co (4%)-N/C   | 767.54                                              | 0.34                                      | 0.27                                                 | 79.41                    | 4.43                       |
| Co (4%)-N/CNS | 494.64                                              | 1.00                                      | 0.08                                                 | 8.35                     | 13.32                      |

*t* – total and *mic* - micropore.

**Table S2.** Summary and comparison of mesoporosity and  $S_{\text{BET}}$  surface area of recently reported carbon catalysts derived from MOFs and/or g- $\text{C}_3\text{N}_4$ .

| Catalysts     | Isotherm type | Mesopores (nm) | $S_{\text{BET}}$ surface area ( $\text{m}^2\cdot\text{g}^{-1}$ ) | Reference |
|---------------|---------------|----------------|------------------------------------------------------------------|-----------|
| NHCS          | II            | 2–25           | 122.73                                                           | [1]       |
| N-FLG         | IV            | < 10           | 81.58                                                            | [2]       |
| Co/N-BCNTs    | IV            | 3–5            | 359                                                              | [3]       |
| BCNT/Co       | IV            | < 10           | 291.4                                                            | [4]       |
| Co-N/CNT      | IV            | 2–4            | 261                                                              | [5]       |
| CoP/NCNHP     | IV            | < 10           | 86.5                                                             | [6]       |
| NCNTs-20      | IV            | –              | 151                                                              | [7]       |
| N-Co/CNF-800  | IV            | 2–6            | 223.89                                                           | [8]       |
| NiCo-NC       | IV            | < 5            | 337.1                                                            | [9]       |
| GCNs          | IV            | 2–35~          | 377                                                              | [10]      |
| Co (4%)-N/CNS | IV            | 2–50           | 494.6                                                            | This work |

NHCS - nitrogen-doped hollow carbon spheres; FLG - few-layer graphene; BCNTs - bamboo-like carbon nanotube; CNTs – carbon nanotubes; NCNHP - N-doped carbon nanotube hollow polyhedron; CNF - carbon nanofibers; NC – nanocarbon; GCNs - graphitic carbon networks.

**Table S3.** Elemental content and percentage of C, N and Co of Co (4%)-N/C and Co (4%)-N/CNS (estimated by XPS analysis).

|                             | Species          | Co (4%)-N/C | Co (4%)-N/CNS |
|-----------------------------|------------------|-------------|---------------|
| Elemental composition (wt%) | C 1s             | 81.26       | 82.31         |
|                             | N 1s             | 7.25        | 8.64          |
|                             | O 1s             | 9.16        | 7.57          |
|                             | Co 2p            | 2.33        | 1.48          |
| C (wt%)                     | C–C/C=C          | 54.46       | 55.73         |
|                             | C–N              | 1.81        | 5.26          |
|                             | C–O–C            | 5.14        | 4.53          |
|                             | C=O              | 19.85       | 16.79         |
| N (wt%)                     | Pyridinic N      | 0.96        | 1.68          |
|                             | Co– $\text{N}_x$ | 1.01        | 2.04          |
|                             | Pyrrolic N       | 0.68        | 1.5           |
|                             | Graphite N       | 1.71        | 1.40          |
|                             | Oxidized N       | 1.49        | 1.48          |
| Co (wt%)                    | Chemisorbed N    | 1.41        | 0.97          |
|                             | Co (II)          | 1.25        | 0.70          |
|                             | Co– $\text{N}_x$ | 0.50        | 0.48          |

**Table S4.** Analytical performance of the ZIF-derived Co-N/C electrocatalysts-based non-enzymatic electrochemical H<sub>2</sub>O<sub>2</sub> sensors.

| Electrocatalysts | pH  | Potential (V)     | Linearity ( $\mu\text{M}$ ) | LOD ( $\mu\text{M}$ ) | Sensitivity ( $\mu\text{A}\cdot\text{mM}^{-1}\cdot\text{cm}^{-2}$ ) | Response (s) | Reference |
|------------------|-----|-------------------|-----------------------------|-----------------------|---------------------------------------------------------------------|--------------|-----------|
| Co-N/C@G-B       | –   | 0 <sup>a</sup>    | 0.5–60000                   | 0.19                  | 2890                                                                | 3            | [11]      |
| Co-NC RDCs       | 7.4 | -0.3 <sup>b</sup> | 1–30000                     | 0.143                 | 234.913                                                             | <6           | [12]      |
| Co-N/CNT         | 7.0 | -0.7 <sup>b</sup> | 0.05–50000                  | 0.032                 | 568.47                                                              | 2–4          | [5]       |
| Co-NC/CNF        | –   | -0.5 <sup>b</sup> | 10–5000                     | 10                    | 300                                                                 | –            | [13]      |
| Co (4%)-N/CNSs   | 7.0 | -0.7 <sup>b</sup> | 1–500                       | 0.006                 | 468.95                                                              | <4           | This work |
|                  |     |                   | 500–1000000                 |                       | 605.50                                                              |              |           |

<sup>a</sup>Reversible hydrogen electrode; <sup>b</sup>Ag/AgCl (in saturated KCl) electrode.

**Table S5.** Detection of H<sub>2</sub>O<sub>2</sub> in real biological environment.

| Sample  | Added ( $\mu\text{M}$ ) | Found <sup>a</sup> ( $\mu\text{M}$ ) | RSD (%) | Recovery (%) |
|---------|-------------------------|--------------------------------------|---------|--------------|
| Serum 1 | 50                      | 48.83                                | 5.12    | 97.66        |
| Serum 2 | 200                     | 204.43                               | 3.62    | 102.22       |

<sup>a</sup>Average of five determinations.



## References

1. Y. H. Tang, X. Wang, J. J. Chen, X. X. Wang, D. J. Wang and Z. Y. Mao, *Carbon*, 2020, **168**, 458-467.
2. J. L. Liu, Y. Q. Zhang, L. Zhang, F. X. Xie, A. Vasileff and S. Z. Qiao, *Adv. Mater.*, 2019, **31**, 10.
3. R. Wang, T. Yan, L. Han, G. Chen, H. Li, J. Zhang, L. Shi and D. Zhang, *J. Mater. Chem. A*, 2018, **6**, 5752-5761.
4. X. J. Liu, W. X. Yang, L. L. Chen, Z. J. Liu, L. Long, S. Y. Wang, C. Y. Liu, S. J. Dong and J. B. Jia, *ACS Appl. Mater. Interfaces*, 2020, **12**, 4463-4472.
5. Z. Li, R. Liu, C. Tang, Z. Wang, X. Chen, Y. Jiang, C. Wang, Y. Yuan, W. Wang, D. Wang, S. Chen, X. Zhang, Q. Zhang and J. Jiang, *Small*, 2020, **16**, 1902860.
6. Y. Pan, K. A. Sun, S. J. Liu, X. Cao, K. L. Wu, W. C. Cheong, Z. Chen, Y. Wang, Y. Li, Y. Q. Liu, D. S. Wang, Q. Peng, C. Chen and Y. D. Li, *J. Am. Chem. Soc.*, 2018, **140**, 2610-2618.
7. P. P. Su, H. Xiao, J. Zhao, Y. Yao, Z. G. Shao, C. Li and Q. H. Yang, *Chem. Sci.*, 2013, **4**, 2941-2946.
8. Y. Wu, G. L. Xu, W. L. Zhang, C. Song, L. J. Wang, X. Y. Fang, L. J. Xu, S. G. Han, J. Q. Cui and L. Gan, *Carbohydr. Polym.*, 2021, **267**, 7.
9. L. Q. Zhao, Q. H. Wei, L. L. Zhang, Y. F. Zhao and B. Zhang, *Renewable Energy*, 2021, **173**, 273-282.
10. W. Zhang, X. Jiang, X. Wang, Y. V. Kaneti, Y. Chen, J. Liu, J.-S. Jiang, Y. Yamauchi and M. Hu, *Angew. Chem.*, 2017, **56**, 8435-8440.
11. Z. Li, W. Wang, H. Cao, Q. Zhang, X. Zhou, D. Wang, Y. Wang, S. Zhang, G. Zhang, C. Liu, Y. Zhang, R. Liu and J. Jiang, *Adv. Mater. Technol.*, 2017, **2**, 1700224.
12. Z. Wu, L.-P. Sun, Z. Zhou, Q. Li, L.-H. Huo and H. Zhao, *Sens. Actuators, B*, 2018, **276**, 142-149.
13. M. A. Riaz, Z. Yuan, A. Mahmood, F. Liu, X. Sui, J. Chen, Q. Huang, X. Liao, L. Wei and Y. Chen, *Sens. Actuators, B*, 2020, **319**, 128243.
